# Supplementary material for: Black hole jets on the scale of the Cosmic Web
Source: Research Square preprint supplement (doi:10.21203/rs.3.rs-3961204/v1), 2024-02-22
Supplement: Supplementary file 1 [file e7cd29311a21c83529732fe0.pdf]

## Appendix A Supplementary Methods

### Total outflow length

To estimate Porphyrion's total length from its projected length, we perform statistical deprojection. Equation 9 of Oei et al. [48] stipulates the probability density function (PDF) of an outflow's total length random variable (RV)  $L$  in case its projected length RV  $L_p$  is known to equal some value  $l_p$ . This PDF is parametrised by the tail index  $\xi$  of the Pareto distribution assumed to describe  $L$ . We calculate the median and expectation value of  $L \mid L_p = l_p$  for tail indices  $\xi = -3$  and  $\xi = -4$ , the integer values closest to the observationally favoured  $\xi = -3.5 \pm 0.5$  [48].

First, we determine the cumulative distribution function (CDF) of  $L \mid L_p = l_p$  through integration:

$$\begin{aligned} F_{L|L_p=l_p}(l) &:= \int_{-\infty}^l f_{L|L_p=l_p}(l') \, dl' \\ &= \frac{-\xi}{2^{1+\xi}\pi} \frac{\Gamma^2\left(-\frac{\xi}{2}\right)}{\Gamma(-\xi)} \int_1^{\max\{x,1\}} \frac{x'^{\xi-1}}{\sqrt{x'^2-1}} \, dx', \end{aligned} \quad (\text{A1})$$

where  $x := \frac{l}{l_p}$  and  $x' := \frac{l'}{l_p}$ .

For  $\xi = -3$ , the CDF concretises to

$$\begin{aligned} F_{L|L_p=l_p}(l) &= \frac{3}{2} \int_1^{\max\{x,1\}} \frac{dx'}{x'^4 \sqrt{x'^2-1}} \\ &= \begin{cases} 0 & \text{if } x < 1; \\ \frac{(2x^2+1)\sqrt{x^2-1}}{2x^3} & \text{if } x \geq 1. \end{cases} \end{aligned} \quad (\text{A2})$$

The median conditional total length,  $l_m$ , is defined by  $F_{L|L_p=l_p}(l_m) := \frac{1}{2}$ . Numerically, we obtain  $x_m := \frac{l_m}{l_p} \approx 1.0664$ , or  $l_m \approx 1.0664 \, l_p$ . As  $l_p = 6.43 \pm 0.05$  Mpc, we find  $l_m = 6.86 \pm 0.05$  Mpc. An analogous numerical determination of the 16-th and 84-th percentiles then yields  $l = 6.9_{-0.4}^{+1.6}$  Mpc.

For  $\xi = -4$ , the CDF concretises to

$$\begin{aligned} F_{L|L_p=l_p}(l) &= \frac{16}{3\pi} \int_1^{\max\{x,1\}} \frac{dx'}{x'^5 \sqrt{x'^2-1}} \\ &= \begin{cases} 0 & \text{if } x < 1; \\ \frac{2}{3\pi} \left( \frac{(3x^2+2)\sqrt{x^2-1}}{x^4} + 3 \arccos \frac{1}{x} \right) & \text{if } x \geq 1. \end{cases} \end{aligned} \quad (\text{A3})$$

Numerically, we obtain  $x_m \approx 1.0515$ , or  $l_m \approx 1.0515 \, l_p$ , and thus  $l_m = 6.76 \pm 0.05$  Mpc. In the same way as before, we find  $l = 6.8_{-0.3}^{+1.2}$  Mpc.

Equation 10 of Oei et al. [48] gives a closed-form expression for  $\mathbb{E}[L \mid L_p = l_p](\xi)$ . Table 1 of the same work lists  $\mathbb{E}[L \mid L_p = l_p](\xi = -3) = \frac{3\pi}{8}l_p$  and  $\mathbb{E}[L \mid L_p = l_p](\xi = -4) = \frac{32}{9\pi}l_p$ . In the case of Porphyrion, these expressions concretise to  $\mathbb{E}[L \mid L_p = l_p](\xi = -3) = 7.58 \pm 0.06$  Mpc and  $\mathbb{E}[L \mid L_p = l_p](\xi = -4) = 7.28 \pm 0.06$  Mpc.

By conditioning  $L$  on more knowledge than a value for  $L_p$  alone, statistical deprojection could be made more precise. For example, one could additionally condition on the fact that Porphyrion is generated by a Type 2 radiatively efficient (RE) AGN. If Type 1 RE AGN are seen mostly face-on and Type 2 RE AGN are seen mostly edge-on, as proposed by the unification model [e.g. 27], then the detection of a Type 2 RE AGN would imply that the jets make a small angle with the sky plane. Extending the formulae to include this knowledge is beyond the scope of this work; however, mindful of the associated deprojection factor-reducing effect, we choose  $\xi = -4$  as our fiducial tail index.

To assess Porphyrion’s transport capabilities in a cosmological context, it is instructive to calculate its length relative to Cosmic Web length scales. In particular, the outflow’s total length relative to the typical cosmic void radius at its epoch is  $f_v := l(1+z)R_v^{-1}$ , where  $R_v$  is the typical comoving cosmic void radius. For  $l = 6.8_{-0.3}^{+1.2}$  Mpc,  $z = 0.896 \pm 0.001$ , and  $R_v = 20$  Mpc [13], we find  $f_v = 64_{-2}^{+12}$  %. For our fiducial total length  $l = 7$  Mpc, we find  $f_v = 66\%$ .

#### ***Void penetration probability***

Porphyrion’s orientation relative to its native Cosmic Web filament is currently unknown. We calculate the probability that an outflow breaches its filament, thus penetrating the surrounding voids, by assuming that jet orientations are independent from filament orientations. We furthermore assume that the jets are straight and of equal length, that the filament is of cylindrical shape, and that the host galaxy resides at the filament’s spine, where the gravitational potential is lowest. The RV  $\Theta_f$  denotes the angle between the jet axis and the filament axis, whilst the constants  $R_f$  and  $D_f := 2R_f$  denote the filament radius and diameter, respectively. An outflow of total length  $l$  penetrates voids with probability

$$\begin{aligned} \mathbb{P}(L \sin \Theta_f > D_f \mid L = l) &= \mathbb{P}\left(\sin \Theta_f > \frac{D_f}{l}\right) \\ &= 1 - F_{\sin \Theta_f}\left(\frac{D_f}{l}\right). \end{aligned} \quad (\text{A4})$$

The RV  $\Theta_f$  has support on the interval  $0 < \theta \leq \frac{\pi}{2}$ . On this interval, the CDF is

$$\begin{aligned} F_{\Theta_f}(\theta) &:= \mathbb{P}(\Theta_f \leq \theta) = \frac{1}{2\pi} \int_0^\theta \int_0^{2\pi} \sin \theta' \, d\varphi \, d\theta' \\ &= 1 - \cos \theta. \end{aligned} \quad (\text{A5})$$

793 The RV  $\sin \Theta_f$  has support on the interval  $0 < y \leq 1$ . On this interval, the CDF is

$$\begin{aligned} F_{\sin \Theta_f}(y) &:= \mathbb{P}(\sin \Theta_f \leq y) = \mathbb{P}(\Theta_f \leq \arcsin y) \\ &= 1 - \cos \arcsin y = 1 - \sqrt{1 - y^2}, \end{aligned} \quad (\text{A6})$$

794 where we use the fact that the arcsine function is monotonically increasing. By combining Eqs. A4 and  
795 A6, we obtain

$$\mathbb{P}(L \sin \Theta_f > D_f \mid L = l) = \begin{cases} 0 & \text{if } l \leq D_f; \\ \sqrt{1 - \left(\frac{D_f}{l}\right)^2} & \text{if } l > D_f. \end{cases} \quad (\text{A7})$$

796 Typically, however, we only know an outflow's *projected* length — not its *total* length. The quantity of  
797 highest practical interest therefore is

$$\begin{aligned} p_v &:= \mathbb{P}(L \sin \Theta_f > D_f \mid L_p = l_p) \\ &= \mathbb{P}\left(L_p \frac{\sin \Theta_f}{\sin \Theta_o} > D_f \mid L_p = l_p\right) \\ &= \mathbb{P}\left(\frac{\sin \Theta_f}{\sin \Theta_o} > \frac{D_f}{l_p}\right) = 1 - F_X\left(\frac{D_f}{l_p}\right), \end{aligned} \quad (\text{A8})$$

798 where the RV  $\Theta_o$  is the angle between the jet axis and the line of sight, and the RV  $X$  is the ratio of the RVs  
799  $\sin \Theta_f$  and  $\sin \Theta_o$ . These latter RVs are independent and identically distributed:  $F_{\sin \Theta_f}(y) = F_{\sin \Theta_o}(y)$ .  
800 We derive the PDF  $f_X$  by using the standard formula for the ratio distribution PDF (for independent  
801 RVs). This formula demands the determination of  $f_{\sin \Theta_f}(y) = f_{\sin \Theta_o}(y)$ . From Eq. A6, we find that on  
802 the interval  $0 < y \leq 1$ , the PDF is

$$f_{\sin \Theta_f}(y) = \frac{d}{dy} F_{\sin \Theta_f}(y) = \frac{y}{\sqrt{1 - y^2}}. \quad (\text{A9})$$

803 To find the distribution of  $X$ , it is helpful to distinguish three intervals. For  $x \leq 0$ ,  $f_X(x) = 0$ , because  
804  $X$  is the ratio of two positive RVs. Then, for  $0 < x < 1$ ,

$$f_X(x) = x \int_0^1 \frac{y^3}{\sqrt{1 - x^2 y^2} \sqrt{1 - y^2}} dy, \quad (\text{A10})$$

805 while for  $x > 1$ ,

$$f_X(x) = x \int_0^{\frac{1}{x}} \frac{y^3}{\sqrt{1 - x^2 y^2} \sqrt{1 - y^2}} dy. \quad (\text{A11})$$

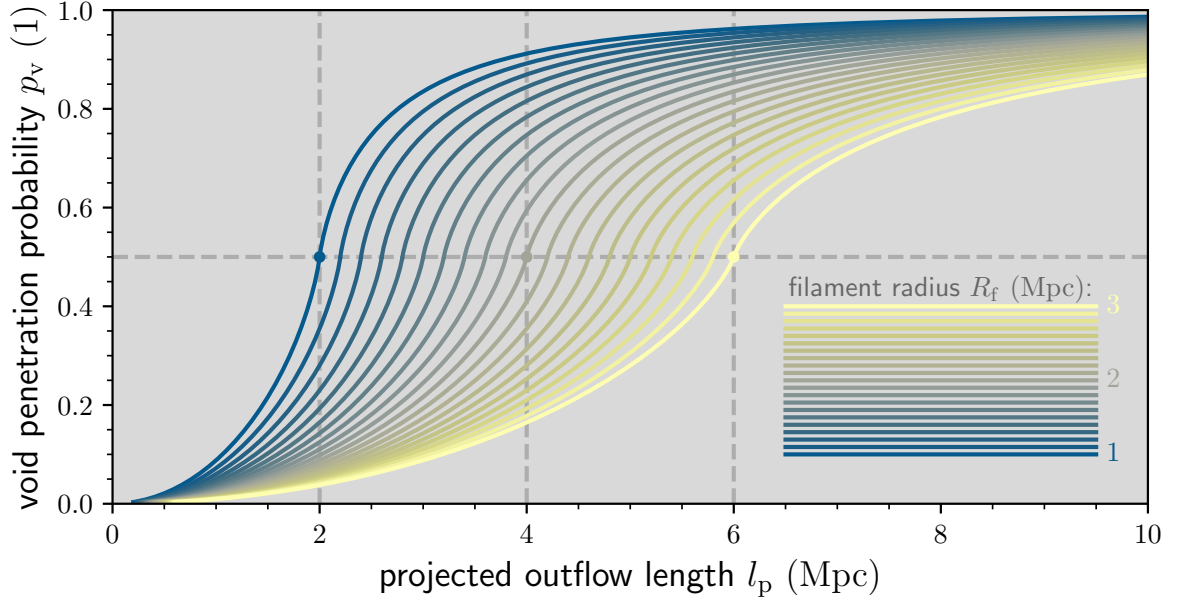

**Fig. A1:** From its projected length and an estimated radius for its native filament, one can calculate the probability that an outflow penetrates the surrounding voids. Outflows with projected lengths equalling the diameters of their filaments penetrate voids with 50% probability (as the dots exemplify).

806 Solving the integrals leads to

$$f_X(x) = \begin{cases} 0 & \text{if } x \leq 0; \\ \frac{(x^2+1) \ln \frac{1+x}{1-x} - 2x}{4x^2} & \text{if } 0 < x < 1; \\ \frac{(x^2+1) \ln \frac{x+1}{x-1} - 2x}{4x^2} & \text{if } x > 1. \end{cases} \quad (\text{A12})$$

807 At  $x = 1$ ,  $f_X$  is undefined. We calculate  $F_X$  through integration, yielding

$$F_X(x) = \begin{cases} 0 & \text{if } x \leq 0; \\ \frac{1}{2} + \frac{1}{4} \left( \left( x + 1 - \frac{1}{x} \right) \ln \frac{1+x}{1-x} + \ln \frac{(1-x)^2}{1-x^2} \right) & \text{if } 0 < x < 1; \\ \frac{1}{2} + \frac{1}{4} \frac{x^2-1}{x} \ln \frac{x+1}{x-1} & \text{if } x > 1. \end{cases} \quad (\text{A13})$$

808  $F_X$  is continuously extendable at  $x = 1$  by defining  $F_X(1) := \frac{1}{2}$ . Finally, we define  $x := \frac{D_t}{l_p}$ , so that

809  $p_v(x) = 1 - F_X(x)$ :

$$p_v(x) = \begin{cases} \frac{1}{2} - \frac{1}{4} \left( \left( x + 1 - \frac{1}{x} \right) \ln \frac{1+x}{1-x} + \ln \frac{(1-x)^2}{1-x^2} \right) & \text{if } 0 < x < 1; \\ \frac{1}{2} & \text{if } x = 1; \\ \frac{1}{2} - \frac{1}{4} \frac{x^2-1}{x} \ln \frac{x+1}{x-1} & \text{if } x > 1. \end{cases} \quad (\text{A14})$$

The median of  $X$  equals unity. Therefore, half of the outflows with projected lengths  $l_p = D_f$  penetrate voids. For outflows with larger projected lengths, void penetration is more likely than not. Figure A1 shows void penetration probabilities for physically relevant parameter ranges.

For Porphyron, we take  $l_p$  as before and adopt a filament (core) radius  $R_f = 1.2$  Mpc [68]; this yields  $x = 0.373 \pm 0.003$  and therefore  $p_v = 95.2 \pm 0.1\%$ .

### *Filament shape modification*

We predict that powerful, long-lived outflows like Porphyron cause their host galaxies' filaments to expand thermally. Through lateral shocks, the jets distribute an amount of heat  $Q$  over the warm-hot IGM. This medium is sufficiently dilute that plasma interactions can be neglected; as a result, the ideal gas law,  $pV = Nk_B T$ , may be adopted as the equation of state. Here,  $p$ ,  $V$ ,  $N$ , and  $T$  are the filament's pressure, volume, plasma particle number, and temperature, respectively;  $k_B$  is Boltzmann's constant. Assuming a thermodynamic process at constant pressure and particle number, the work  $W$  is

$$W = p\Delta V = Nk_B\Delta T. \quad (\text{A15})$$

Before the outflow's emergence, the filament's equation of state is  $pV_i = Nk_B T_i$ , where  $V_i$  and  $T_i$  are its initial volume and temperature, respectively. Upon dividing Eq. A15 by this equation of state, one obtains

$$\frac{\Delta V}{V_i} = \frac{\Delta T}{T_i}. \quad (\text{A16})$$

Assuming that the filament retains a cylindrical shape, initially with radius  $r_i$  and finally with radius  $r_f$ , and using that  $\Delta V := V_f - V_i$ , one obtains

$$\frac{r_f}{r_i} = \sqrt{1 + \frac{\Delta T}{T_i}}. \quad (\text{A17})$$

The radius ratio,  $\frac{r_f}{r_i}$ , depends only on the ratio between the temperature increase  $\Delta T := T_f - T_i$  and the initial temperature. The temperature increase is

$$\Delta T = \frac{Q}{NC_{p,m}}, \quad (\text{A18})$$

where  $C_{p,m}$  is the molar heat capacity at constant pressure. For a monatomic gas or a hydrogen plasma,  $C_{p,m} = \frac{5}{2}R$ , where  $R$  is the molar gas constant. The number of filamentary electrons and atomic nuclei

affected by the outflow is

$$N = \frac{\pi r_i^2 L \rho_i}{\mu m_p}, \quad (\text{A19})$$

where  $L$  is the length of the cylindrical segment affected,  $\rho_i$  is the initial baryonic mass density,  $\mu$  is the average mass of a plasma particle relative to the proton mass, and  $m_p$  is the proton mass. We estimate  $\frac{L}{2}$  by multiplying the typical speed of lateral shocks with the outflow's lifetime. We decompose  $\rho_i = \rho_{c,0} \Omega_{\text{BM},0} (1+z)^3 (1+\delta)$ , where  $z$  and  $\delta$  are the filament's cosmological redshift and baryonic overdensity, respectively.

We assess the outflow-induced morphological change to Porphyrion's filament by evaluating Eq. A17, taking  $Q = 10^{55}$  J,  $r_i = 1.2$  Mpc,  $L = 7$  Mpc,  $z = 0.9$ ,  $1 + \delta = 10$ ,  $\mu = 0.5$ , and  $T_i = 10^7$  K; we find  $\Delta T = 9 \cdot 10^6$  K and  $r_f = 1.7$  Mpc (an increase of  $\sim 40\%$ ). Porphyrion's heat dissipation renders the outflow's native filament much hotter and thicker than it would have otherwise been.

#### *Transport of heavy elements to voids*

Outflows from RE AGN could contain more heavy atoms than outflows from RI AGN: RE AGN tend to reside in galaxies with higher star formation rates and thus more vigorous stellar winds, suggesting increased entrainment of wind-borne atomic nuclei into jets [77]. The order-of-magnitude calculations presented here, to be verified by future simulations, indicate that Mpc-scale outflows could supply Mpc<sup>3</sup>-scale volumes in cosmic voids with significant heavy atoms, though consistent with upper limits [65].

We calculated the heavy element enrichment of the IGM in voids due to the deposition of atomic nuclei initially entrained in the jets of Mpc-scale outflows. In particular, we estimated the final metallicity in the deposition region considering both internal and external entrainment. Internal entrainment refers to the entrainment into jets of atomic nuclei from stellar winds, *internal* to the host galaxy. External entrainment refers to the entrainment into jets of atomic nuclei dwelling in the IGM, *external* to the host galaxy.

Denoting the (two-sided) internal mass entrainment rate by  $\dot{M}_i$ , which we assumed constant through time, the total internally entrained mass by an outflow of age  $T$  is

$$M_i = \dot{M}_i T. \quad (\text{A20})$$

The internal mass entrainment rates of Centaurus A and 3C 31, both Fanaroff–Riley I (FR I) outflows in the Local Universe, are estimated to be  $\dot{M}_i = 2 \cdot 10^{-3} M_\odot \text{ yr}^{-1}$  [77] and  $\dot{M}_i = 8 \cdot 10^{-3} M_\odot \text{ yr}^{-1}$  [35], respectively. At  $M_\star = 6.3 \cdot 10^{11} M_\odot$ , 3C 31's host stellar mass is similar to Porphyrion's. However, Porphyrion is a Fanaroff–Riley II (FR II) outflow, suggesting a smaller jet opening angle  $\omega$  and thus a

smaller  $\dot{M}_i$ . If  $\omega$  is a factor of order unity smaller for FR II outflows than for FR I outflows [e.g. 36, 59], and  $\dot{M}_i \propto \omega^2$ , then  $\dot{M}_{\text{FR II}} \sim 10^{-1} \dot{M}_{\text{FR I}}$ . On the other hand, Porphyron's host is seen much closer to the cosmic heyday of star formation, suggesting a larger SFR and thus a larger  $\dot{M}_i$ . After  $z = 1.9$ , SFRs  $S$  typically decayed exponentially with an  $e$ -folding time of 3.9 Gyr [e.g. 40]. If  $\dot{M}_i \propto S$ , then  $\dot{M}_i(z = z_P) \sim e^2 \dot{M}_i(z = 0) \sim 10^1 \dot{M}_i(z = 0)$ , where  $z_P$  is Porphyron's redshift. Assuming that both effects are indeed of comparable importance, we provisionally adopted 3C 31's  $\dot{M}_i = 8 \cdot 10^{-3} M_\odot \text{ yr}^{-1}$  as our fiducial value. Taking  $T$  as before, we obtained  $M_i = 2 \cdot 10^7 M_\odot$ . The total externally entrained mass is

$$M_e = 2 \int_0^l \rho_e(r) A_e(r) dr, \quad (\text{A21})$$

where  $A_e(r)$  is the entrainment cross-section at a distance  $r$  from the AGN. Perhaps the simplest approach is to parametrise  $A_e = \pi R_e^2$ , where  $R_e$  is a (constant) effective radius defined such that all baryons closer to the jet axis than  $R_e$  are entrained. Taking  $l$  and  $\rho_e$  as before, and  $R_e = 1 \text{ kpc}$  [e.g. 55], we obtained  $M_e = 4 \cdot 10^7 M_\odot$ . Although highly uncertain, these estimates suggest that  $M_i$  and  $M_e$  can be of the same order of magnitude.

The total internally entrained mass in heavy elements is  $Z_i M_i$ , where  $Z_i$  is the mass-weighted mean metallicity of the galaxy's stellar winds. The total externally entrained mass in heavy elements is  $Z_e M_e$ , where  $Z_e$  is the mass-weighted metallicity of the IGM along the jet. Assuming that the IGM in the voids is initially pristine, its final metallicity is

$$Z_v = \frac{Z_i M_i + Z_e M_e}{M_i + M_e + \rho_v V}, \quad (\text{A22})$$

where  $\rho_v$  is the baryon mass density within a deposition region of volume  $V$ . Taking a spherical deposition region with a diameter of 1 Mpc, and  $\rho_v$  as before, we obtained  $\rho_v V = 7 \cdot 10^9 M_\odot$ . Assuming  $Z_i = Z_\odot$  [e.g. 77] and  $Z_e = 10^{-1} Z_\odot$  [e.g. 42], we found  $Z_v = 3 \cdot 10^{-3} Z_\odot$ . In conclusion, order-of-magnitude arguments suggest that void-penetrating Mpc-scale outflows can endow the local IGM with metallicities  $Z_v \sim 10^{-3} - 10^{-2} Z_\odot$ .

### *Quasar mass-based host galaxy candidate elimination*

SDSS J152933.03+601552.5 is the quasar-hosting galaxy 19'' north-northeast of J152932.16+601534.4, the galaxy we have identified as Porphyron's host. We initially also considered SDSS J152933.03+601552.5 as a host galaxy candidate. However, aforementioned arguments involving the presence of jets and their orientation and, to a lesser degree, arguments involving core radio luminosity and core synchrotron self-absorption all favour J152932.16+601534.4. We now discuss how our results would

change if, instead, SDSS J152933.03+601552.5 were Porphyrior's host galaxy. Doing so will lead to a contradiction that disproves this alternative hypothesis.

First, we discuss results that do not require dynamical modelling. To start with, Porphyrior would remain generated by an RE AGN. The host galaxy redshift would decrease from  $z = 0.896 \pm 0.001$  to  $z = 0.799 \pm 0.001$ , decreasing Porphyrior's projected length from  $l_p = 6.43 \pm 0.05$  Mpc to  $l_p = 6.21 \pm 0.05$  Mpc. Again using  $\xi = -4$ , the total length would decrease from  $l = 6.8^{+1.2}_{-0.3}$  Mpc to  $l = 6.5^{+1.2}_{-0.3}$  Mpc and its conditional expectation from  $\mathbb{E}[L \mid L_p = l_p] = 7.28 \pm 0.06$  Mpc to  $\mathbb{E}[L \mid L_p = l_p] = 7.03 \pm 0.06$  Mpc. If orientation distinguishes Type 1 from Type 2 RE AGN, as the unification model supposes, then these statistical deprojection results may underestimate Porphyrior's total length. Porphyrior would remain the projectively largest galaxy-made structure identified so far. Porphyrior's total radio luminosity at rest-frame wavelength  $\lambda_r = 2$  m would decrease from  $L_\nu = 2.8 \pm 0.3 \cdot 10^{26}$  W Hz $^{-1}$  to  $L_\nu = 2.2 \pm 0.2 \cdot 10^{26}$  W Hz $^{-1}$ .

Next, we discuss results that come from dynamical modelling. The jet power would decrease from  $Q = 1.3 \pm 0.1 \cdot 10^{39}$  W to  $Q = 1.0 \pm 0.1 \cdot 10^{39}$  W, while the age would slightly increase from  $T = 1.9^{+0.7}_{-0.2}$  Gyr to  $T = 1.9^{+0.7}_{-0.1}$  Gyr.<sup>6</sup> The transported energy would decrease from  $E = 7.6^{+2.1}_{-0.7} \cdot 10^{55}$  J to  $E = 6.4^{+1.8}_{-0.6} \cdot 10^{55}$  J, and the black hole mass gain from  $\Delta M_\bullet > 8.5^{+2.4}_{-0.8} \cdot 10^8 M_\odot$  to  $\Delta M_\bullet > 7.2^{+2.9}_{-0.7} \cdot 10^8 M_\odot$ .

Finally, we arrive at a contradiction, as the quasar's SMBH mass (measured from its SDSS BOSS spectrum)  $M_\bullet = 2.5 \pm 0.3 \cdot 10^8 M_\odot$  [11]. This mass is lower than the minimum mass gain associated to the fuelling of Porphyrior's jets. Thus, assuming that SDSS J152933.03+601552.5 is the outflow's host galaxy leads to a contradiction. This argument reaffirms that J152932.16+601534.4 is Porphyrior's host.

### *Diffusion of lobe plasma through voids*

When cosmic rays move through the jumbled magnetic fields of galaxy clusters and filaments of the Cosmic Web, the Lorentz force scatters them repeatedly. The mean free path of the ensuing random walk is so short that the CRs radiate away their energy before they are able to travel a cosmologically significant distance [e.g. 6]. Clusters and filaments thus effectively lock into place the CRs that are injected into them. By contrast, magnetic fields with Mpc-scale coherence lengths in voids are orders of magnitude weaker than those in clusters and filaments [e.g. 10], and as a result, CRs that are released into voids might diffuse through their entirety within a few gigayears. Void-filling diffusion of CRs might be especially rapid at early epochs: during Porphyrior's lifetime, for instance, the proper volumes of voids were on average an order of magnitude smaller than they are today.

Consider a void region filled with relativistic particles, so that their velocity components obey

$$v_x^2 + v_y^2 + v_z^2 \approx c^2. \quad (\text{A23})$$

---

<sup>6</sup>Significant jet-mediated transport of heavy elements to the IGM would remain plausible. The host's stellar mass would decrease from  $M_\star = 6.7 \pm 1.4 \cdot 10^{11} M_\odot$  to  $M_\star = 4.0^{+0.3}_{-0.3} \cdot 10^{11} M_\odot$ , while the SFR would become  $S = 4.9^{+0.3}_{-0.4} \cdot 10^1 M_\odot \text{ yr}^{-1}$  [3].

918 We treat  $v_x$ ,  $v_y$ , and  $v_z$  as random variables subject to the above constraint. If the particles have no bulk  
 919 motion, and move in all directions with equal probability density,

$$\mathbb{E}[v_x^N] = \mathbb{E}[v_y^N] = \mathbb{E}[v_z^N] \quad (\text{A24})$$

920 for any  $N \in \mathbb{R}$ . In particular, given the absence of bulk motion,  $\mathbb{E}[v_x] = \mathbb{E}[v_y] = \mathbb{E}[v_z] = 0$ . By taking  
 921 expectations on both sides of Eq. A23, using the linearity of expectation, and invoking Eq. A24, we find

$$\mathbb{E}[v_x^2] = \mathbb{E}[v_y^2] = \mathbb{E}[v_z^2] = \frac{c^2}{3}. \quad (\text{A25})$$

922 Without loss of generality, we assume the region's magnetic field  $\vec{B}$  to be oriented along the  $z$ -axis. The  
 923 speed perpendicular to  $\vec{B}$  is  $v_\perp = \sqrt{v_x^2 + v_y^2}$ , so that, upon invoking Eq. A25, we find  $\mathbb{E}[v_\perp^2] = \frac{2}{3}c^2$ . A  
 924 typical speed for relativistic particles perpendicular to a magnetic field thus is

$$\sqrt{\mathbb{E}[v_\perp^2]} = \sqrt{\frac{2}{3}}c \approx 0.8165 \, c. \quad (\text{A26})$$

925 Starting from Fick's first law of diffusion, and solving the case of Brownian motion in three dimensions,  
 926 one obtains

$$r = \sqrt{6Dt}, \quad (\text{A27})$$

927 where  $r$  is the typical proper distance to the particles' origin after a time  $t$ . To find the diffusion coefficient  
 928  $D$ , we consider Bohm diffusion, in which charged particles diffuse through a turbulent magnetic field as  
 929 a result of the Lorentz force. Whereas predicting the trajectory of any single charged particle requires  
 930 knowledge of the specific magnetic field structure in its surroundings, the statistical properties of Bohm  
 931 diffusion are determined solely by the statistical properties of the magnetic field and the charge and  
 932 energy of the diffusing particles. The Larmor radius for a particle with Lorentz factor  $\gamma$ , total velocity  
 933  $v$ , rest mass  $m$ , and charge  $q$ , is

$$r_L = \frac{\gamma(v)mv_\perp}{|q|B}. \quad (\text{A28})$$

934 For a relativistic particle whose  $v_\perp$  is given by Eq. A26, we obtain a Larmor radius

$$r_L(E) = \sqrt{\frac{2}{3}} \frac{E}{c|q|B} = 8.8 \cdot 10^2 \, \text{pc} \cdot \frac{E}{1 \, \text{GeV}} \cdot \frac{10^{-15} \, \text{G}}{B}, \quad (\text{A29})$$

where  $E$  is the total (i.e. rest plus kinetic) energy of the particle. The diffusion coefficient for charged particles in a magnetic field with a Kolmogorov turbulence spectrum is well approximated [21] by

$$D(E) \approx D_{\text{Bohm}}(E_0) \left( \frac{E}{E_0} \right)^{\frac{1}{3}} + D_{\text{Bohm}}(E_1) \left( \frac{E}{E_1} \right)^2. \quad (\text{A30})$$

Here,  $E_0$  is the energy for which the circumference of gyration equals the magnetic field coherence length  $\lambda_c$ :

$$2\pi r_L(E_0) = \lambda_c. \quad (\text{A31})$$

For  $q = \pm e$ , where  $e$  is the elementary charge, this equation implies that

$$E_0 = \sqrt{\frac{3}{2}} \frac{\lambda_c c |q| B}{2\pi} = 1.8 \cdot 10^2 \text{ GeV} \cdot \frac{\lambda_c}{1 \text{ Mpc}} \cdot \frac{B}{10^{-15} \text{ G}}. \quad (\text{A32})$$

Furthermore,  $E_1 = \frac{3}{2} E_0$ . The Bohm diffusion coefficient [e.g. 21]  $D_{\text{Bohm}}$  is

$$D_{\text{Bohm}}(E) = \frac{c}{3} r_L(E) \quad (\text{A33})$$

$$= 9.0 \cdot 10^{-2} \frac{\text{Mpc}^2}{\text{Gyr}} \cdot \frac{E}{1 \text{ GeV}} \cdot \frac{10^{-15} \text{ G}}{B}. \quad (\text{A34})$$

We note that

$$D_{\text{Bohm}}(E_0) = \frac{c}{6\pi} \lambda_c = 1.6 \cdot 10^1 \frac{\text{Mpc}^2}{\text{Gyr}} \cdot \frac{\lambda_c}{1 \text{ Mpc}} \quad (\text{A35})$$

is independent of the void's magnetic field strength. Because  $D_{\text{Bohm}} \propto r_L \propto E$ , we have  $D_{\text{Bohm}}(E_1) = \frac{3}{2} D_{\text{Bohm}}(E_0)$ .

For  $E = 1 \text{ GeV}$ ,  $\lambda_c = 1 \text{ Mpc}$ , and  $B = 10^{-15} \text{ G}$ , we find  $D(E) = 2.9 \frac{\text{Mpc}^2}{\text{Gyr}}$ . After  $t = 1 \text{ Gyr}$ , the typical displacement of cosmic rays that escaped from the outflow's lobes is  $r = 4.2 \text{ Mpc}$ . We note that  $r$  scales slowly with particle energy, magnetic field strength, and (to a lesser degree) with coherence length:

$$r \propto E^{\frac{1}{6}} B^{-\frac{1}{6}} \lambda_c^{\frac{1}{3}} t^{\frac{1}{2}}. \quad (\text{A36})$$

947 For short time intervals  $t$ , we can ignore the expansion of the Universe; defining  $r_c := r(1+z)$ , the void  
 948 volume-filling fraction  $\mathcal{V}$  of a single lobe becomes

$$\mathcal{V} = \left( \frac{2r_c}{D_c} \right)^3. \quad (\text{A37})$$

949 For sufficiently short time intervals  $t$ , particles move in rectilinear fashion, and the typical proper  
 950 displacement of a relativistic particle within  $t$  is  $r = ct$ , not  $r = \sqrt{6Dt}$ . Diffusion can only possibly provide  
 951 an accurate description of the typical displacement for sufficiently large  $t$ . As superluminal motion is  
 952 impossible,

$$\sqrt{6Dt} < ct, \text{ or } t > \frac{6D}{c^2} =: \tau_d, \quad (\text{A38})$$

953 where  $\tau_d$  is the diffusion timescale (as in Globus et al. [21], but with a factor 6 instead of 4). Diffusion  
 954 only has a role to play in the description of particle movement through voids when  $\tau_d < \tau_b$ , the ballistic  
 955 timescale for particle movement through voids. We define

$$\tau_b := \frac{R_c}{(1+z)c}, \quad (\text{A39})$$

956 where  $R_c$  is the comoving void radius. As  $\tau_d \propto D$ , there is a maximum diffusion coefficient,  $D_{\max}$ , above  
 957 which the diffusive description is invalid. Solving  $\tau_d(D_{\max}) = \tau_b$  for  $D_{\max}$ , we obtain

$$D_{\max} = \frac{R_c c}{6(1+z)}. \quad (\text{A40})$$

958 This maximum diffusion coefficient corresponds to a minimum magnetic field strength,  $B_{\min}$ . Approxi-  
 959 mating  $D_{\max} \approx D_{\text{Bohm}}(E, B_{\min})$ , we find

$$B_{\min} = 2\sqrt{\frac{2}{3}} \frac{(1+z)E}{c|q|R_c} \quad (\text{A41})$$

$$= 8.8 \cdot 10^{-20} \text{ G} \cdot \frac{E}{1 \text{ GeV}} \cdot \frac{20 \text{ Mpc}}{R_c} \cdot \frac{1+z}{1} \cdot \frac{e}{|q|}. \quad (\text{A42})$$

960 We should only apply diffusion theory to the problem of particle movement through voids for void  
 961 magnetic field strengths  $B \gg B_{\min}$ . For particle energies of 1 GeV, we therefore only consider diffusion  
 962 for  $B \gtrsim 10^{-18} \text{ G}$ .

The diffusing cosmic rays lose energy over time. In voids, losses by inverse Compton scattering to CMB photons are by far more important than losses by synchrotron radiation, because

$$\frac{P_{\text{IC,CMB}}}{P_s} = \frac{B_{\text{CMB}}^2(z)}{B^2}, \quad (\text{A43})$$

and  $B_{\text{CMB}}^2(z) \gg B^2$  in voids. (Here,  $P_{\text{IC}}$  and  $P_s$  are, respectively, the inverse Compton and synchrotron powers of a single cosmic ray.) The inverse Compton loss timescale for an electron or positron of total energy  $E$  at cosmological redshift  $z$  is

$$\tau_{\text{IC,CMB}}(E, z) := \frac{E}{P_{\text{IC,CMB}}(E, z)} \quad (\text{A44})$$

$$= \frac{6m_e^2 c^3 \mu_0}{4\beta^2 E \sigma_T B_{\text{CMB}}^2(0)(1+z)^4} \quad (\text{A45})$$

$$= 1.2 \text{ Gyr} \cdot \frac{1}{\beta^2} \cdot \frac{1 \text{ GeV}}{E} \cdot \frac{1}{(1+z)^4}, \quad (\text{A46})$$

where  $\sigma_T$  is the Thomson cross-section for electrons and positrons. For protons, the inverse Compton loss timescale equals the above multiplied by a factor  $\left(\frac{m_p}{m_e}\right)^4 \approx 1.1 \cdot 10^{13}$ . Therefore, for non-ultra-high-energy cosmic ray protons, both synchrotron *and* inverse Compton losses are negligible.

Because  $\frac{dD}{dE} > 0$ , diffusion slows down as particles lose energy; in other words, a particle's *highest* diffusion coefficient is its *initial* diffusion coefficient.

Let  $X_c$  be the comoving displacement along the  $x$ -direction. We consider  $N$  time steps, each of length  $\tau := \frac{t}{N}$ . Let  $X_{c,i}$  be the comoving displacement along the  $x$ -direction achieved in the  $i$ -th time step, and let  $X_i$  be the corresponding proper displacement.

$$X_c := \sum_{i=1}^N X_{c,i} \quad (\text{A47})$$

Because  $\mathbb{E}[X_{c,i}] = 0$ ,  $\mathbb{E}[X_c] = \sum_{i=1}^N \mathbb{E}[X_{c,i}] = 0$ . Therefore

$$\mathbb{E}[X_c^2] = \mathbb{V}[X_c] = \sum_{i=1}^N \mathbb{V}[X_{c,i}] = \sum_{i=1}^N \mathbb{E}[X_{c,i}^2]. \quad (\text{A48})$$

Because  $X_{c,i} = (1+z_i)X_i$ ,  $\mathbb{E}[X_{c,i}^2] = (1+z_i)^2 \mathbb{E}[X_i^2]$ . Therefore

$$\mathbb{E}[X_c^2] = \sum_{i=1}^N (1+z_i)^2 \frac{\mathbb{E}[X_i^2]}{2\tau} \cdot 2\tau. \quad (\text{A49})$$

978 Following Einstein's definition of the diffusion coefficient, the proper diffusion coefficient in the  $x$ -direction  
 979 for the  $i$ -th time step,  $D_{x,i}$ , is

$$D_{x,i} := \frac{\mathbb{E}[X_i^2]}{2\tau}. \quad (\text{A50})$$

980 We can then write

$$\mathbb{E}[X_c^2] = 2\tau \sum_{i=1}^N (1 + z_i)^2 D_{x,i}. \quad (\text{A51})$$

981 Proceeding analogously for the  $y$ - and  $z$ -directions, and defining  $R_c^2 := X_c^2 + Y_c^2 + Z_c^2$ , we find

$$\mathbb{E}[R_c^2] = \mathbb{E}[X_c^2] + \mathbb{E}[Y_c^2] + \mathbb{E}[Z_c^2] \quad (\text{A52})$$

$$= 2\tau \sum_{i=1}^N (1 + z_i)^2 (D_{x,i} + D_{y,i} + D_{z,i}). \quad (\text{A53})$$

982 In the isotropic case,  $D_{x,i} = D_{y,i} = D_{z,i} =: D_i$ , so that

$$\mathbb{E}[R_c^2] = 6\tau \sum_{i=1}^N (1 + z_i)^2 D_i = 6t \cdot \frac{1}{N} \sum_{i=1}^N (1 + z_i)^2 D_i. \quad (\text{A54})$$

983 Denoting the (time) average of a function  $f(t)$  by  $\langle f \rangle$ , we have

$$r_c := \sqrt{\mathbb{E}[R_c^2]} = \sqrt{6\langle (1 + z)^2 D \rangle t}. \quad (\text{A55})$$

984 Let  $E$  be an RV denoting particle energy, and let  $f_E$  be its PDF. Let  $n_l$  be the lobe particle number  
 985 density, and let  $R_l$  be the lobe radius. The number of particles in an outer shell with thickness  $\Delta R$  with  
 986 energies between  $E$  and  $E + dE$  is

$$dN(E) = 4\pi R_l^2 \Delta R \cdot n_l f_E(E) dE. \quad (\text{A56})$$

987 These particles escape from the shell over a timescale

$$\tau_e(E) = \frac{\Delta R^2}{2D_{\perp,c}(E)}, \quad (\text{A57})$$

988 where  $D_{\perp,c}$  is the compound cross-field diffusion coefficient [19]. The number of particles with energies  
 989 between  $E$  and  $E + dE$  escaping from the shell per unit of time thus is

$$\frac{dN(E)}{\tau_e(E)} = \frac{8\pi R_1^2 \cdot D_{\perp,c}(E) \cdot n_1 f_E(E) dE}{\Delta R}. \quad (\text{A58})$$

990 The particulate energy escaping from the shell per unit of time and unit of energy, which we shall call  
 991 the power density  $P_E$ , is

$$P_E(E) := E \cdot \frac{dN(E)}{\tau_e(E) dE} = \frac{8\pi R_1^2 \cdot D_{\perp,c}(E) \cdot n_1 f_E(E) E}{\Delta R}. \quad (\text{A59})$$

992 Finally, the total power  $P$  is

$$P := \int_E P_E(E) dE = \frac{8\pi R_1^2 n_1}{\Delta R} \int_E D_{\perp,c}(E) E f_E(E) dE \quad (\text{A60})$$

$$= \frac{8\pi R_1^2 n_1}{\Delta R} \mathbb{E}_E[D_{\perp,c}(E) E]. \quad (\text{A61})$$

993 The compound cross-field diffusion coefficient is [17]

$$D_{\perp,c}(E) \approx D_{\perp}(E) \left( 1 + \frac{\Lambda^2(E)}{\ln \Lambda(E)} \right), \quad (\text{A62})$$

994 where  $D_{\perp}$  is the cross-field diffusion coefficient, given by

$$D_{\perp}(E) \approx \frac{c}{3} r_L(E) \delta_B(r_L(E)). \quad (\text{A63})$$

995 Here

$$\delta_B(l) \approx f_i \cdot \left( \frac{l}{l_i} \right)^{\frac{2}{3}}, \quad (\text{A64})$$

996 where  $l_i$  is the turbulence injection scale and  $f_i$  is the total turbulence energy density up to this scale,  
 997 relative to the energy density of the thermal medium surrounding the lobe [19]. Additionally,

$$\Lambda(E) = \frac{1}{\sqrt{2}} \frac{\delta_B(\lambda_{c,1})}{\delta_B(r_L(E))} = \frac{1}{\sqrt{2}} \left( \frac{\lambda_{c,1}}{r_L(E)} \right)^{\frac{2}{3}}, \quad (\text{A65})$$

where  $\lambda_{c,l}$  is the lobe's magnetic field correlation length. We assume that  $E$  has a Pareto distribution [e.g. 73], so that its PDF,  $f_E$ , (for  $p \neq -1$ ) is given by

$$f_E(E) = \begin{cases} \frac{p+1}{E_{\max}^{p+1} - E_{\min}^{p+1}} E^p & \text{if } E_{\min} < E < E_{\max}; \\ 0 & \text{otherwise;} \end{cases} \quad (\text{A66})$$

and  $E_{\min} := \gamma_{\min} m c^2$  and  $E_{\max} := \gamma_{\max} m c^2$ . We calculated the total power assuming  $R_l = 100$  kpc,  $\Delta R = \lambda_{c,l} = 10$  kpc,  $l_i = 10$  kpc,  $f_i = 10^{-2}$ ,  $B = B_l = 10^{-7}$  G,  $|q| = e$ ,  $m = m_e$ ,  $p = -2.4$ ,  $\gamma_{\min} = 10$ ,  $\gamma_{\max} = 10^5$ , and  $n_l = 10^{-10} \text{ cm}^{-3}$ . We find  $P = 10^{30}$  W.

To estimate the final void magnetic field strength  $B_v$ , we followed an argument akin to that in Beck et al. [4]. If the lobe would expand to fill the entire void, then magnetic flux conservation yields

$$B_v = B_l \left( \frac{R_l}{R_v} \right)^2. \quad (\text{A67})$$

By squaring and dividing both sides of this equation by  $2\mu_0$ , one recasts it in terms of magnetic energy densities and obtains

$$u_{B_v} = u_{B_l} \left( \frac{R_l}{R_v} \right)^4. \quad (\text{A68})$$

However, only a fraction of the lobe's magnetic energy can escape, and it is only this fraction that we should consider in our calculation. If we assume that the magnetic energy that is carried out of the lobe is comparable to the energy of the escaped particles, which equals  $Pt$ , then

$$u_{B_v} = \frac{Pt}{E_l} u_{B_l} \left( \frac{R_l}{R_v} \right)^4, \quad (\text{A69})$$

where  $E_l$  is the total magnetic energy of the lobe. Recasting this equation back to magnetic field strengths, we obtain

$$B_v = \sqrt{\frac{Pt}{E_l}} \left( \frac{R_l}{R_v} \right)^2 B_l. \quad (\text{A70})$$

The energy ratio in Beck et al. [4]'s analogous Eq. 4 should likewise appear under a square root. This is a matter of typography only: the authors did take the square root to obtain their results (private communication with M. Hanasz). For  $t = 10^0$  Gyr,  $E_l = 10^{55}$  J,  $R_v = 10^1$  Mpc, and  $P$ ,  $R_l$ , and  $B_l$  as before, we obtained  $B_v = 6 \cdot 10^{-16}$  G.
